# Supplementary material for: Composition and Rheological Properties of Polysaccharide Extracted from Tamarind (Tamarindus indica L.) Seed
Source: MDPI journal article supplement (doi:10.3390/molecules24071218), 2019-03-28
Supplement: s1 [file s1]

## Supplementary Materials

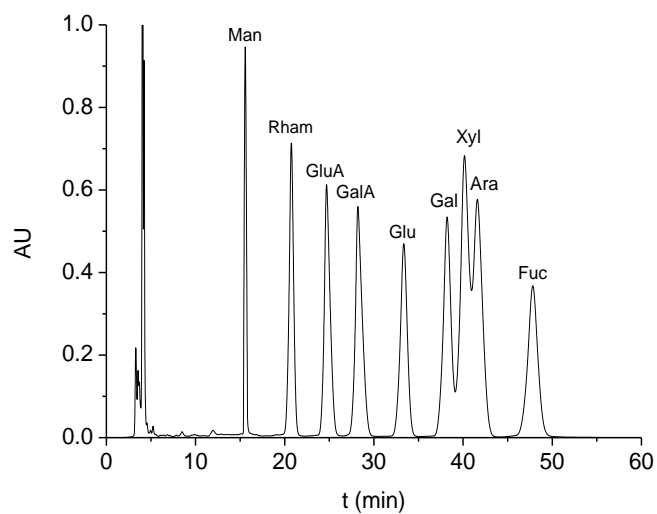

**Figure S1.** The elution curve of PMP derivatives of mixed monosaccharide standards hydrolysate by HPLC

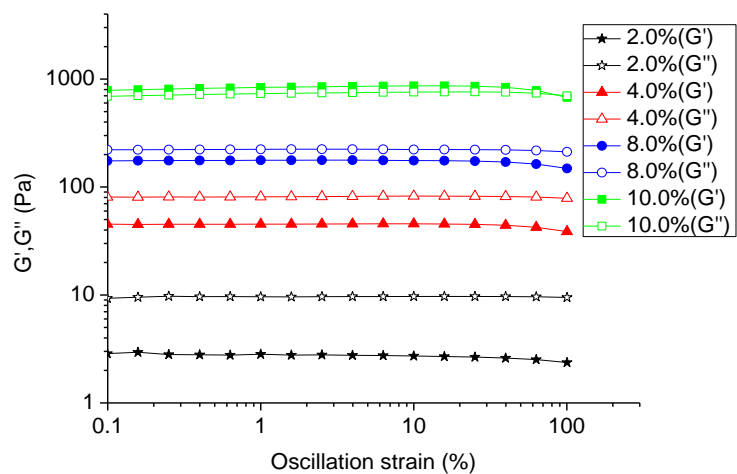

**Figure S2.** Strain dependency of shear modulus  $G'$ (storage) and  $G''$ (loss) of TSP at different concentrations at 25 °C
